# Supplementary material
Source: PubMed Central journal article supplement (PMC8091098)
Supplement: IAI.00041-21-s0001.pdf [file IAI.00041-21-s0001.pdf]

- 1 **supplementary material**
- 2 **supplementary figures**

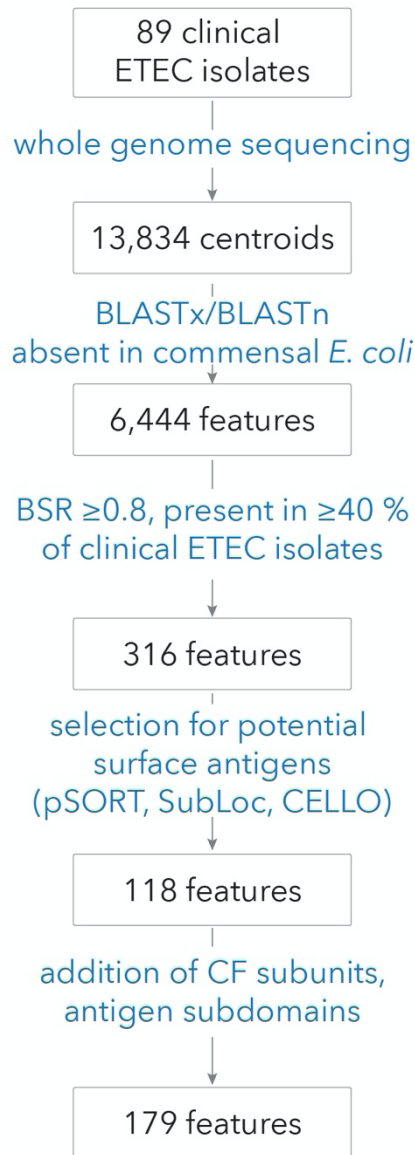

3

4 **supplementary figure 1.** reverse vaccinology strategy used to identify potential surface  
5 antigens conserved within the ETEC pathovar. Whole genome sequencing was used to  
6 identify candidate genes (centroids), subtracting elements common to commensal *E. coli*  
7 strains. BLAST Score Ratio analysis (1) was then used to define unique features found in at  
8 least 40% of ETEC. The resulting 316 features were then analyzed for potential surface  
9 expression using pSORT (2), SubLoc (3), and CELLO (4).

10

11

12

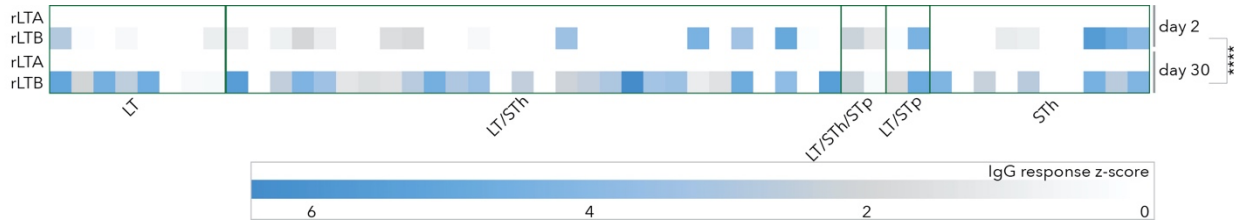

13

14 **supplementary figure 2. serum** IgG responses to LT subunits LT-A and LT-B following  
15 infection. Shown are array z-score data from days 2 and 30 following presentation to icddrb.  
16 Data are segregated by the toxin profile of the ETEC strain isolated at presentation.  
17 \*\*\*\*= $p < 0.0001$  by Wilcoxon matched pairs comparison of day 2 and day 30 LT-B responses.

18



31

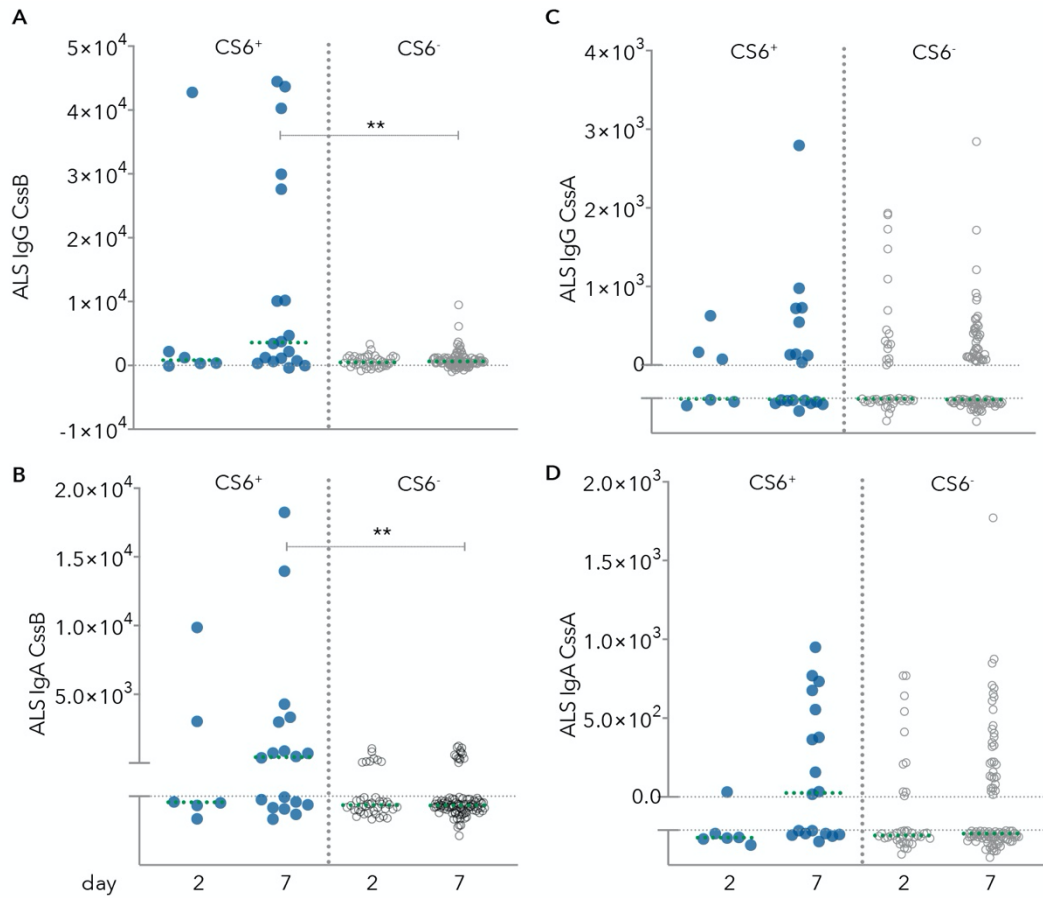

32

33 **supplementary figure 4.** ALS responses to CS6 subunits following ETEC infection. **(A)** IgG  
34 response to CssB. **(B)** IgA response to CssB. \*\* $p < 0.01$ , Kruskal-Wallis post-hoc analysis using  
35 Dunn's test adjusted for multiple comparisons. **(C)** IgG response to CssA. **(D)** IgA response to  
36 CssA.

37

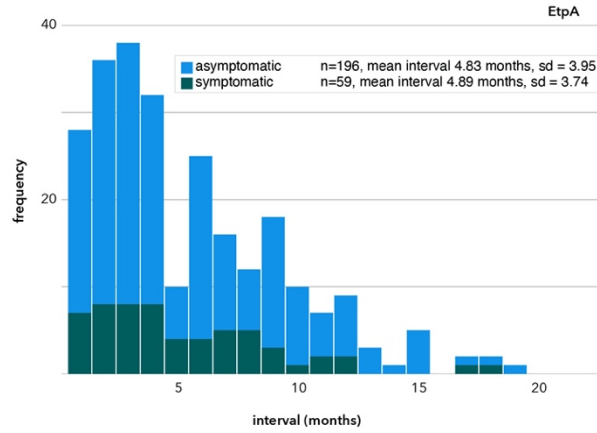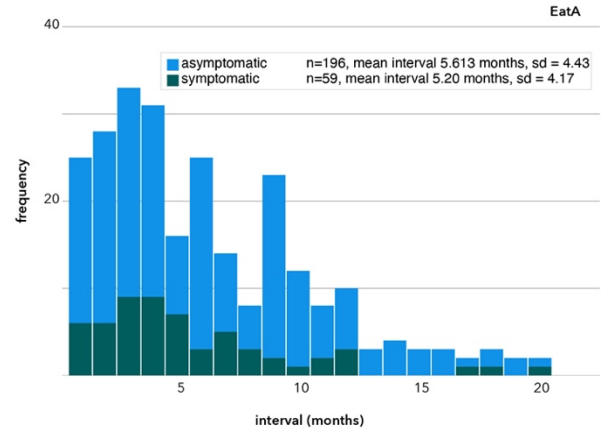

38

39 **supplementary figure 5.** Interval between peak serum responses to EtpA (left), EatA (right)  
 40 and identification of subsequent ETEC + samples in asymptomatic and symptomatic children.

41

42 **supplementary tables**43 **supplementary table 1**

| supplementary table 1. primers used in strain interrogation |                               |                  |                       |              |
|-------------------------------------------------------------|-------------------------------|------------------|-----------------------|--------------|
| gene                                                        | reference sequence<br>GenBank | amplicon<br>(bp) | Sequence (5'>3')      | primer ID    |
| <i>eatA</i>                                                 | AY163491.2                    | 1943             | ATGTGCTTTGGCAGGTAA    | jf082213.1-F |
|                                                             |                               |                  | ATATCCAGTCAGCACCCACT  | jf082213.2-R |
| <i>etpA</i>                                                 | AY920525.2                    | 999              | GGTTCAGGCAGTATCCAGAC  | jf082213.3-F |
|                                                             |                               |                  | GGTGTAGCTGTCTGACCACA  | jf082213.4-R |
| <i>eltB</i>                                                 | CBJ04425.1                    | 273              | ACGGCGTTACTATCCTCTC   | jf092313.3-F |
|                                                             |                               |                  | TGGTCTCGGTCAGATATGTG  | jf092313.4-R |
| <i>estP</i><br>( <i>sta1</i> )                              | CBJ04435.1                    | 166              | TCTTCCCCTCTTTAGTCAG   | jf092313.5-F |
|                                                             |                               |                  | ACAGGCAGGATTACAACAAAG | jf092313.6-R |
| <i>estH</i><br>( <i>sta2</i> )                              | CBJ04483.1                    | 64               | TACAAGCAGGATTACAACAC  | jf092313.7-F |
|                                                             |                               |                  | AGTGGTCCTGAAAGCATG    | jf092313.8-R |

44

45

46

47 **supplemental datasets**

48 **supplemental dataset 1**

49 Complete annotation of all array features, and primers used in amplification.

50 **supplemental dataset 2**

51 ALS IgG and ALS IgA array responses, and sample metadata.

52

53 **references**

- 54 1. Rasko DA, Myers GS, Ravel J. 2005. Visualization of comparative genomic analyses by  
55 BLAST score ratio. *BMC Bioinformatics* 6:2.
- 56 2. Yu NY, Wagner JR, Laird MR, Melli G, Rey S, Lo R, Dao P, Sahinalp SC, Ester M, Foster  
57 LJ, Brinkman FS. 2010. PSORTb 3.0: improved protein subcellular localization  
58 prediction with refined localization subcategories and predictive capabilities for all  
59 prokaryotes. *Bioinformatics* 26:1608-15.
- 60 3. Chen H, Huang N, Sun Z. 2006. SubLoc: a server/client suite for protein subcellular  
61 location based on SOAP. *Bioinformatics* 22:376-7.
- 62 4. Yu CS, Lin CJ, Hwang JK. 2004. Predicting subcellular localization of proteins for  
63 Gram-negative bacteria by support vector machines based on n-peptide  
64 compositions. *Protein Sci* 13:1402-6.

65
